# Supplementary material for: The Promise and Challenges of Cyclic Dinucleotides as Molecular Adjuvants for Vaccine Development
Source: MDPI journal article supplement (doi:10.3390/vaccines9080917), 2021-08-17
Supplement: s1 [file s1]

# The promise and challenges of cyclic dinucleotides as molecular adjuvants for vaccine development

Hongbin Yan<sup>1,\*</sup> and Wangxue Chen<sup>2,3,\*</sup>

<sup>1</sup> Department of Chemistry, Brock University, St. Catharines, ON L2S 3A1, Canada

<sup>2</sup> Human Health and Therapeutics Research Centre, National Research Council Canada, Ottawa, ON K1A 0R6, Canada

<sup>3</sup> Department of Biological Sciences, Brock University, St. Catharines, ON L2S 3A1, Canada

\* Correspondence: tyan@brocku.ca (H.Y.); Wangxue.Chen@nrc.gc.ca (W.C.)

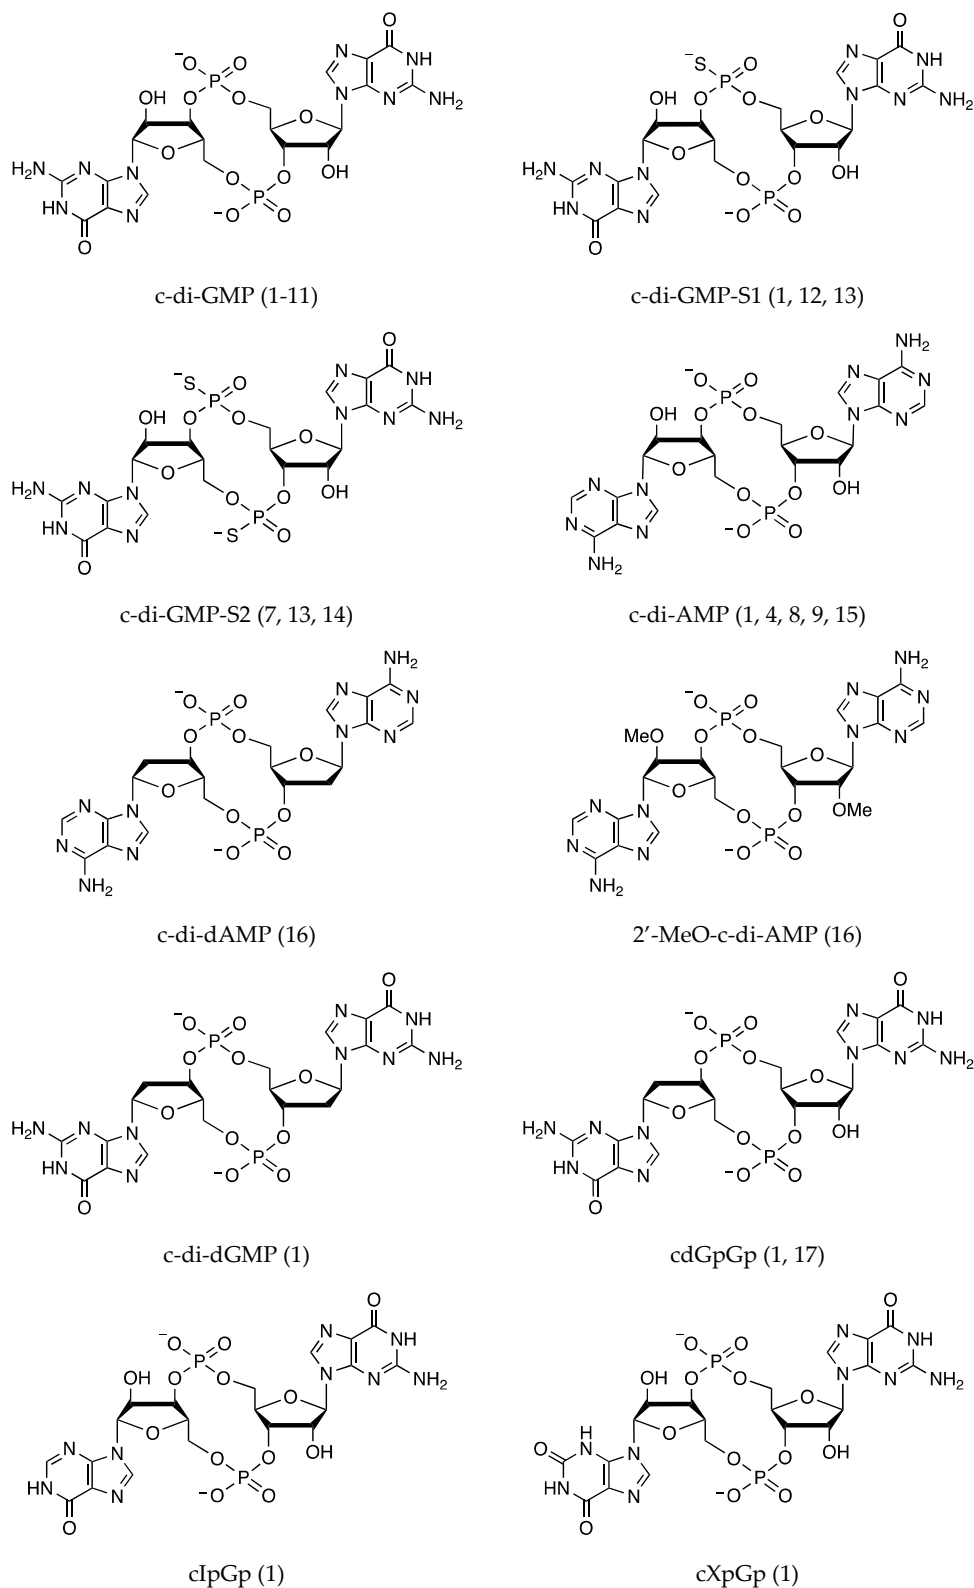

**Figure S1.** Selected CDNs containing 3'-5' internucleotide phosphate/phosphorothioate linkages reported in the literature.

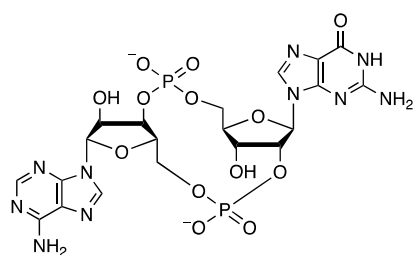

2'3'-cGAMP (24)

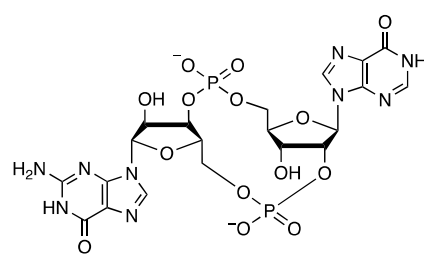

2'3'-cIGMP (20)

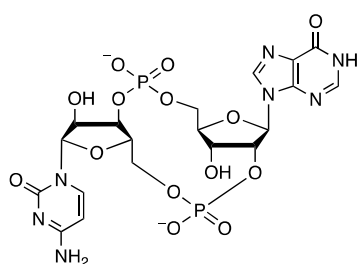

2'3'-cICMP (20)

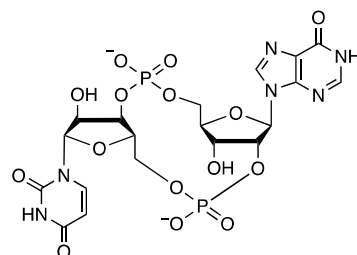

2'3'-cIUMP (20)

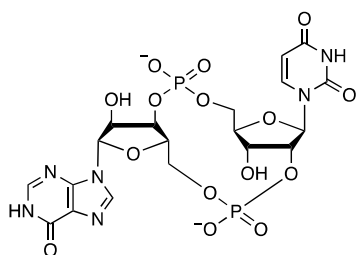

2'3'-cUIMP (20)

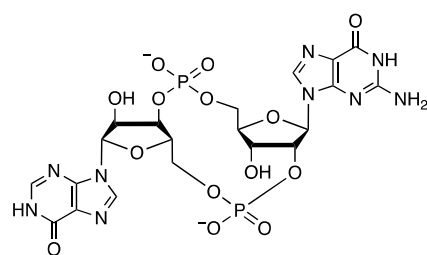

2'3'-cGIMP (20)

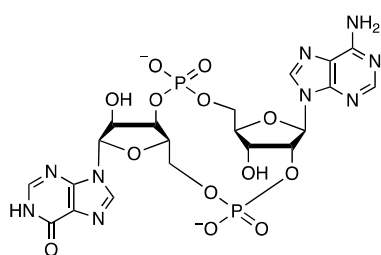

2'3'-cAIMP (19, 20)

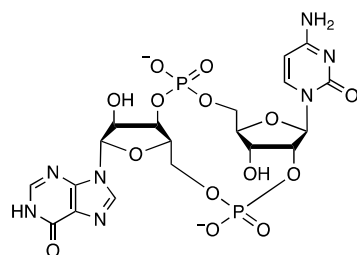

2'3'-cCIMP (20)

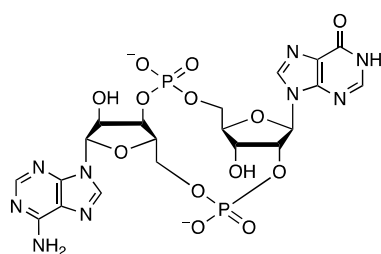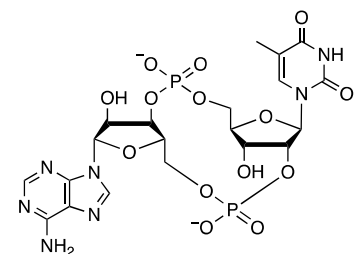

**Figure S2.** Selected CDNs containing 2'-5' and both 2'-5' and 3'-5' internucleotide phosphate/phosphorothioate linkages reported in the literature.

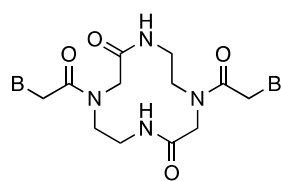

B = thymine, uracil, cytosine, adenine or guanine

PNA backbone (27)

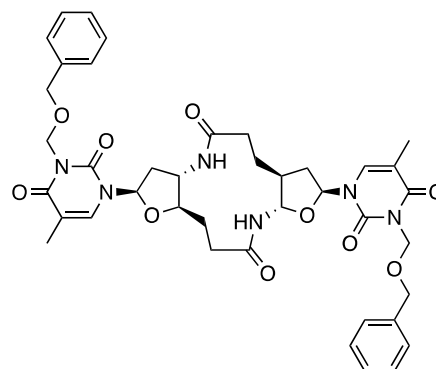

Amide backbone (28)

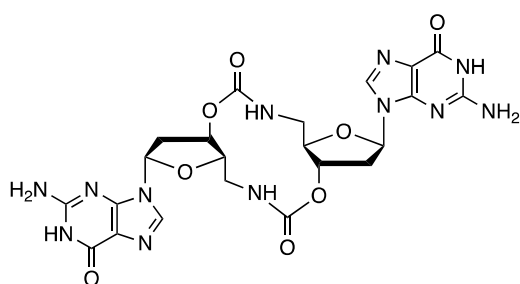

Carbamate backbone (29)

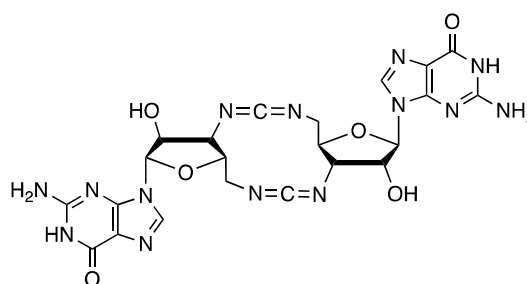

X = O, S, NH or NMe

Carbodiimide, urea, thiourea and guanidinium backbone (30)

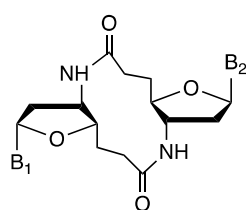

B<sub>1</sub> = B<sub>2</sub> = cytosine  
B<sub>1</sub> = B<sub>2</sub> = uracil  
B<sub>1</sub> = B<sub>2</sub> = thymine

Amide backbone (31)

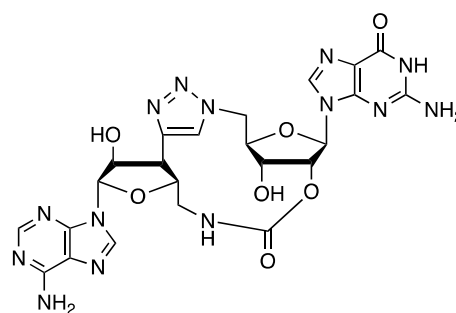

Triazolyl backbone (32)

**Figure S3.** Selected CDN analogs with internucleotide linkages that are not phosphorous based.

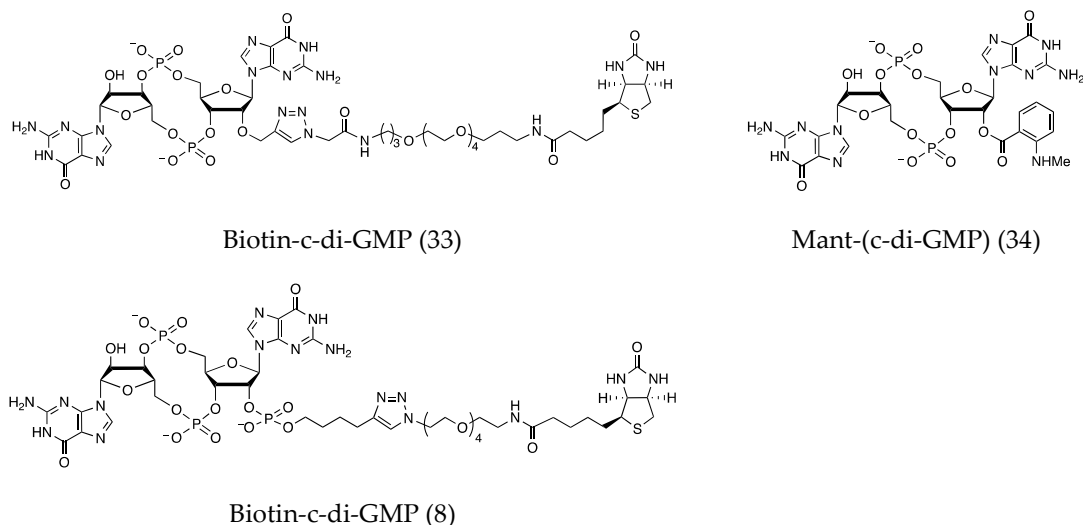

**Figure S4.** c-di-GMP conjugates reported.

## References

- Ross P, Mayer R, Weinhouse H, Amikam D, Huggirat, Y., Benziman, M.; et al. The cyclic diguanylic acid regulatory system of cellulose synthesis in acetobacter-xylinum - chemical synthesis and biological-activity of cyclic-nucleotide dimer, trimer, and phosphothioate derivatives. *Journal of Biological Chemistry*. 1990;265(31):18933-43.
- Hayakawa Y, Nagata R, Hirata A, Hyodo, M., Kawai, R. A facile synthesis of cyclic bis(3'-> 5')diguanylic acid. *Tetrahedron*. 2003;59(34):6465-71.
- Yan HB, Aguilar AL. Synthesis of 3',5'-cyclic diguanylic acid (cdiGMP) using 1-(4-chlorophenyl)-4-ethoxypiperidin-4-yl as a protecting group for 2'-hydroxy functions of ribonucleosides. *Nucleosides Nucleotides & Nucleic Acids*. 2007;26(2):189-204.
- Amiot, N., Heintz, K., Giese, B. New approach for the synthesis of c-di-GMP and its analogues. *Synthesis-Stuttgart*. 2006(24):4230-6.
- Kiburu I, Shurer A, Yan L, Sintim HO. A simple solid-phase synthesis of the ubiquitous bacterial signaling molecule, c-di-GMP and analogues. *Molecular Biosystems*. 2008;4(6):518-20.
- Ching SM, Tan WJ, Chua KL, Lam YL. Synthesis of cyclic di-nucleotidic acids as potential inhibitors targeting diguanylate cyclase. *Bioorganic & Medicinal Chemistry*. 2010;18(18):6657-65.
- Gaffney BL, Veliath, E., Zhao JW, Jones RA. One-flask syntheses of c-di-GMP and the [Rp,Rp] and [Rp,Sp] thiophosphate analogues. *Organic Letters*. 2010;12(14):3269-71.
- Gaffney BL, Stebbins ND, Jones RA. Synthesis of biotinylated c-di-GMP And c-di-AMP using Click conjugation. *Nucleosides Nucleotides & Nucleic Acids*. 2013;32(1):1-16.
- Wang CH, Sinn M, Stifel J, Heiler AC, Sommershof, A., Hartig JS. Synthesis of all possible canonical (3'-5'-linked) cyclic dinucleotides and evaluation of riboswitch interactions and immune-stimulatory effects. *Journal of the American Chemical Society*. 2017;139(45): 16154-60.
- Tsukamoto, M., Oyama, K. Recent application of acidic 1,3-azolium salts as promoters in the solution-phase synthesis of nucleosides and nucleotides. *Tetrahedron Letters*. 2018;59(26):2477-84.
- Grajkowski A, Takahashi M, Kaczynski T, Srivastava SC, Beaucage SL. An improved phosphoramidite approach for the chemical synthesis of 3',5'-cyclic diguanylic acid. *Tetrahedron Letters*. 2019;60(5):452-5.
- Hyodo, M., Sato, Y., Hayakawa, Y. Synthesis of cyclic bis(3'-5')diguanylic acid (c-di-GMP) analogs. *Tetrahedron*. 2006;62(13):3089-94.
- Yan HB, Wang XL, KuoLee, R., Chen WX. Synthesis and immunostimulatory properties of the phosphorothioate analogues of cdiGMP. *Bioorganic & Medicinal Chemistry Letters*. 2008;18(20):5631-4.
- Knouse KW, deGruyter JN, Schmidt MA, Zheng B, Vantourout JC, Kingston, C.; et al. Unlocking P(V): Reagents for chiral phosphorothioate synthesis. *Science*. 2018;361(6408): 1234-8.

15. Suzuki N, Oyama K, Tsukamoto, M. Practical synthesis of cyclic bis(3'-5')diadenylic acid (c-di-AMP). *Chemistry Letters*. 2011;40(10):1113-4.
16. Tezuka T, Suzuki N, Ishida K, Oyama K, Aoki S, Tsukamoto, M. Synthesis of 2'-modified cyclic bis(3'-5')diadenylic acids (c-di-AMPs) and their promotion of cell division in a freshwater green alga. *Chemistry Letters*. 2012;41(12):1723-5.
17. Mano E, Hyodo M, Sato Y, Ishihara, Y., Ohta, M., Hayakawa, Y. Synthesis of cyclic bis(3'-5')-2'-deoxyguanylic/guanylic acid (c-dGpGp) and its biological activities to microbes. *Chemmedchem*. 2007;2(10):1410-3.
18. Li J, Lee RK, Chen WX, Yan HB. 2'-Fluoro-c-di-GMP as an oral vaccine adjuvant. *RSC Advances*. 2019;9(71):41481-9.
19. Lioux T, Mauny MA, Lamoureux A, Bascoul N, Hays M, Vernejoul, F.; et al. Design, synthesis, and biological evaluation of novel cyclic adenosine-inosine monophosphate (cAIMP) analogs that activate stimulator of interferon genes (STING). *Journal of Medicinal Chemistry*. 2016;59(22):10253-67.
20. Wang ZH, Zhao CC, Wang CL, Zhang H, Ma DJ, Zhang QZ; et al. Synthesis and biological evaluation of all possible inosine-mixed cyclic dinucleotides that activate different hSTING variants. *Bioorganic & Medicinal Chemistry*. 2021;29: 115899.
21. Roembke BT, Zhou J, Zheng Y, Sayre D, Lizardo, A., Bernard, L.; et al. A cyclic dinucleotide containing 2-aminopurine is a general fluorescent sensor for c-di-GMP and 3',3'-cGAMP. *Molecular Biosystems*. 2014;10(6):1568-75.
22. Shiraishi K, Saito-Tarashima N, Igata Y, Murakami K, Okamoto, Y., Miyake, Y.; et al. Synthesis and evaluation of c-di-4'-thioAMP as an artificial ligand for c-di-AMP riboswitch. *Bioorganic & Medicinal Chemistry*. 2017;25(14):3883-9.
23. Shchokolova AS, Rymko AN, Kvach SV, Shabunya PS, Fatykhova SA, Zinchenko AI. Enzymatic synthesis of 2'-ara and 2'-deoxy analogues of c-di-GMP. *Nucleosides Nucleotides & Nucleic Acids*. 2015;34(6):416-23.
24. Zhang X, Shi HP, Wu JX, Zhang XW, Sun LJ, Chen, C.; et al. Cyclic GMP-AMP containing mixed phosphodiester linkages is an endogenous high-affinity ligand for STING. *Molecular Cell*. 2013;51(2):226-35.
25. Xie, X., Liu JY, Wang XW. Design, Synthesis and biological evaluation of (2',5' and 3'5'-linked) cGAMP analogs that activate stimulator of interferon genes (STING). *Molecules*. 2020;25(22): 5285.
26. Corrales L, Glickman LH, McWhirter SM, Kanne DB, Sivick KE, Katibah GE; et al. Direct activation of STING in the tumor microenvironment leads to potent and systemic tumor regression and immunity. *Cell Reports*. 2015;11(7):1018-30.
27. Verheijen JC, Grotenbreg GM, de Ruyter LH, van der Klein PAM, van der Marel GA, van Boom JH. An expeditious liquid-phase synthesis of cyclic peptide nucleic acids. *Tetrahedron Letters*. 2000;41(20):3991-5.
28. Chakraborty TK, Koley D, Prabhakar S, Ravi R, Kunwar AC. Synthesis and conformational studies of amide-linked cyclic homooligomers of a thymidine-based nucleoside amino acid. *Tetrahedron*. 2005;61(40):9506-12.
29. Kline T, Jackson SR, Deng W, Verlinde, C., Miller SI. Design and synthesis of bis-carbamate analogs of cyclic bis-(3'-5')-diguanylic acid (c-di-GMP) and the acyclic dimer PGPG. *Nucleosides Nucleotides & Nucleic Acids*. 2008;27(12):1282-300.
30. Gaffney BL, Jones RA. Synthesis of c-di-GMP analogs with thiourea, urea, carbodiimide, and guanidinium linkages. *Organic Letters*. 2014;16(1):158-61.
31. Pal, C., Chakraborty TK. Synthesis of amide-linked cyclic dinucleotide analogues with pyrimidine bases. *Asian Journal of Organic Chemistry*. 2017;6(10):1421-7.
32. Dialer CR, Stazzoni S, Drexler DJ, Muller FM, Veth, S., Pichler, A.; et al. A Click-chemistry linked 2'3'-cGAMP analogue. *Chemistry – A European Journal*. 2019;25(8):2089-95.
33. Grajkowski A, Cieslak J, Gapeev A, Schindler, C., Beaucage SL. Convenient synthesis of a propargylated cyclic (3'-5') diguanylic acid and its "Click" conjugation to a biotinylated azide. *Bioconjugate Chemistry*. 2010;21(11):2147-52.
34. Sharma IM, Dhanaraman T, Mathew R, Chatterji, D. Synthesis and characterization of a fluorescent analogue of cyclic di-GMP. *Biochemistry*. 2012;51(27):5443-53.
